# Supplementary material
Source: Royal Society of Chemistry journal article supplement (doi:10.1039/d6nr00796a)
Supplement: d6nr00796a1.pdf [file d6nr00796a1.pdf]

## Supporting Information

# Tea Polyphenol Increases Nanoplastics Release from Plastic Cups but Mitigates Potential Detrimental Effects during Simulated Tea Drinking

*Haoxin Ye<sup>a</sup>, David D. Kitts<sup>a</sup>, Xiwen Wang<sup>a</sup>, Tianyu Wang,<sup>a</sup> Yifan Wang<sup>a</sup>, and Tianxi Yang<sup>a\*</sup>*

<sup>a</sup> Food, Nutrition and Health, Faculty of Land and Food Systems, The University of British Columbia, Vancouver V6T1Z4, Canada

**\*Corresponding author: Tianxi Yang (tianxi.yang@ubc.ca)**

**Table of contents:**

**Figure S1.** SERS detection of nanoplastics utilizing EGCG-based L-MPNs labeling method.

**Figure S2.** Investigation of the relationship between the concentration of NPs and the SERS characteristic peak intensity at  $1357\text{ cm}^{-1}$  using linear regression model.

**Figure S3.** Impact of heating methods on SERS intensity using L-MPNs labeling during simulated tea consumption.

**Figure S4.** SERS spectra of NPs release across various EGCG concentrations and pH conditions (5, 7, 9) in boiling water.

**Figure S5.** Control study.

**Figure S6.** Raw SERS spectra of NPs release samples at different EGCG concentrations subjected to various microwave heating durations

**Figure S7.** Raw SERS spectra of NPs release samples over various reuse cycles.

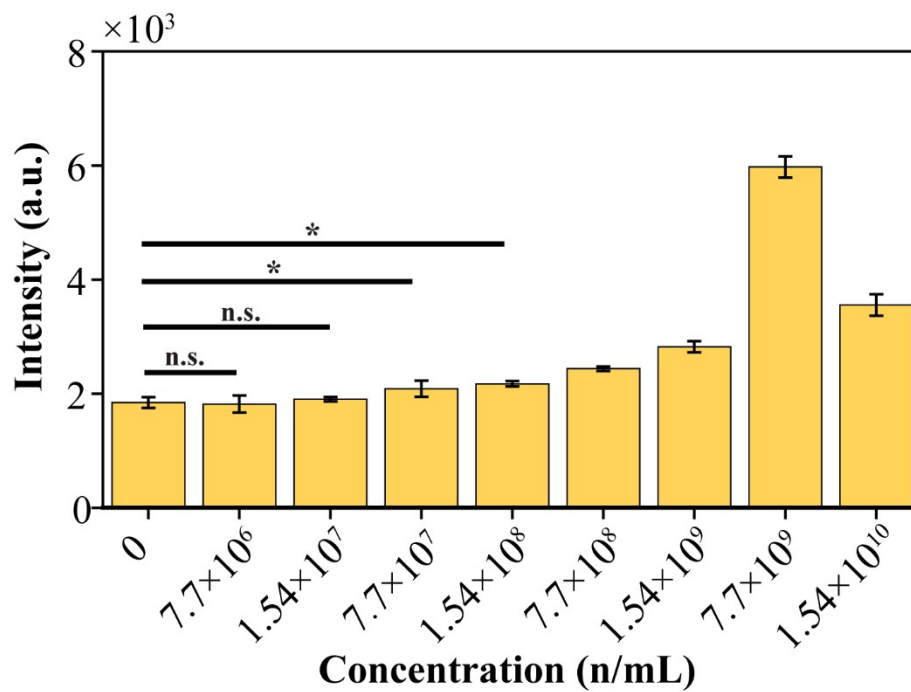

**Figure S1.** SERS detection of nanoplastics utilizing EGCG-based L-MPNs labeling method. Data are represented as mean  $\pm$  SD of three technical replicates. The label "ns" denotes no significant difference, whereas the asterisk "\*" signifies a statistically significant difference with a p-value  $<$  0.05, as determined by the t-test.

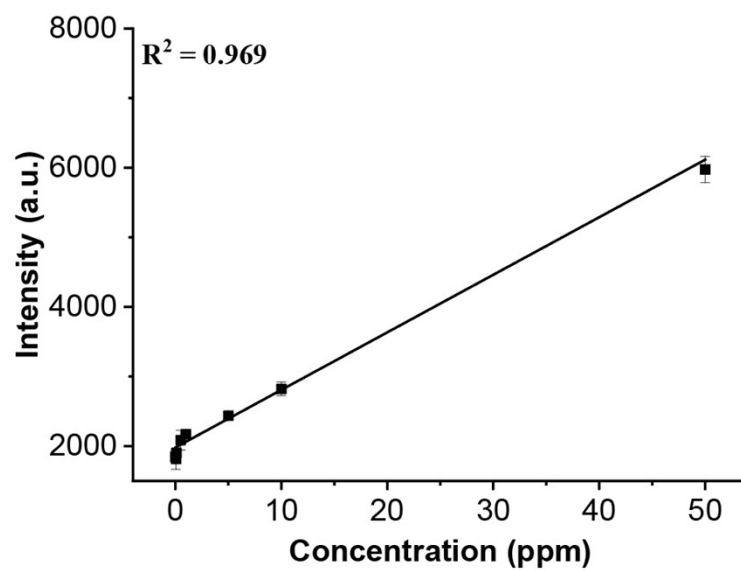

**Figure S2.** Investigation of the relationship between the concentration of NPs and the SERS characteristic peak intensity at  $1357\text{ cm}^{-1}$  from L-MPNs employing linear regression model.

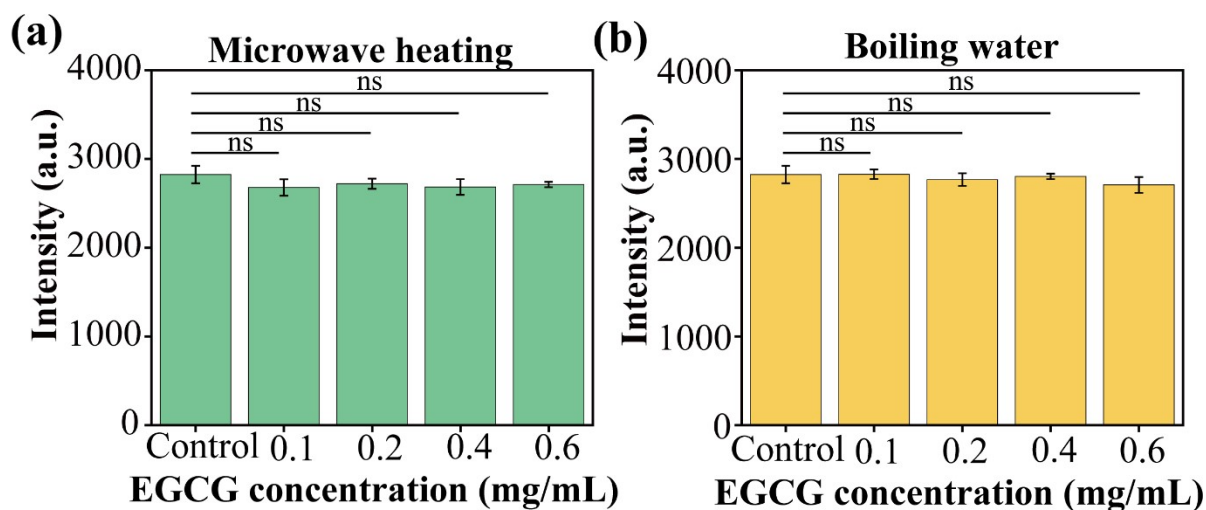

**Figure S3.** Impact of heating methods on SERS intensity using L-MPNs labeling during simulated tea consumption. (a) SERS intensity at  $1357\text{ cm}^{-1}$  (from RhB) for PS NPs of 10 ppm, under varying EGCG concentrations (0.1, 0.2, 0.4, 0.6 mg/mL) using microwave heating for 180 s. (b) SERS intensity at  $1357\text{ cm}^{-1}$  (from RhB) for PS NPs of 10 ppm, under varying EGCG concentrations (0.1, 0.2, 0.4, 0.6 mg/mL) using boiling water conditions. Post-heating, each sample was supplemented with additional EGCG to achieve a final concentration of 1 mg/mL. Data are expressed as mean  $\pm$  SD from three technical replicates. The notation "ns" indicates no significant differences as determined by a t-test.

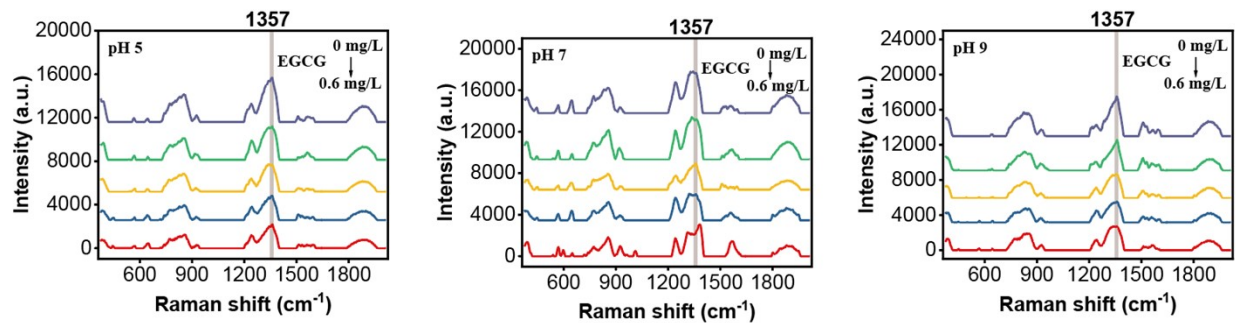

**Figure S4.** SERS spectra of NPs release across various EGCG concentrations (0, 0.1, 0.2, 0.4, 0.6 mg/mL) and pH conditions (5, 7, 9) in boiling water.

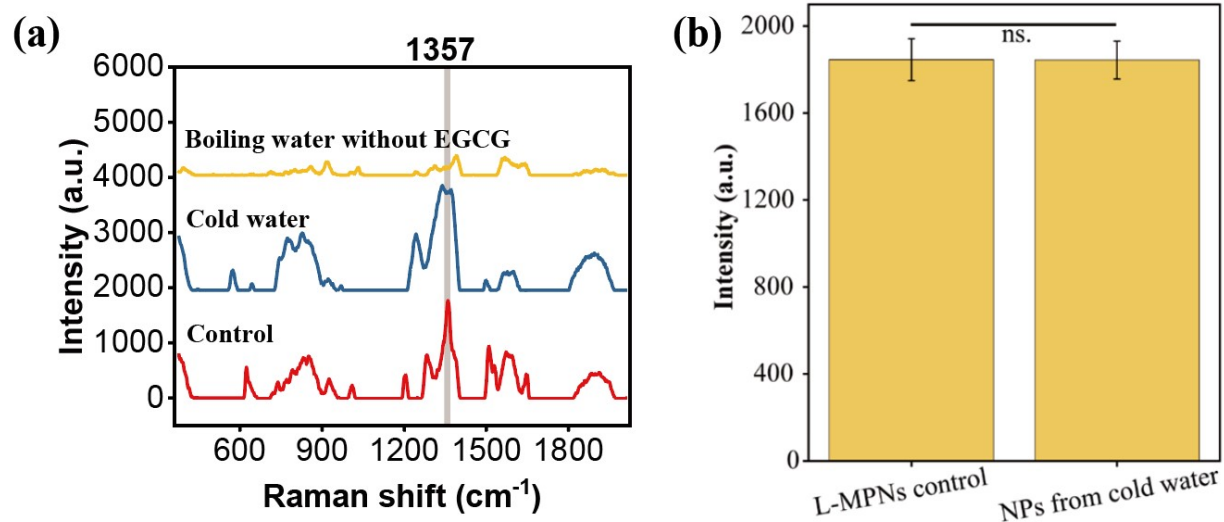

**Figure S5.** Control study. (a) SERS spectra of L-MPNs control, NPs from cold water following L-MPNs labeling and boiling water samples from PS cups without EGCG added. (b) SERS intensity at 1357 cm<sup>-1</sup> for L-MPNs control, NPs from cold water following L-MPNs labeling. "ns" indicates no significant difference as determined by a t-test.

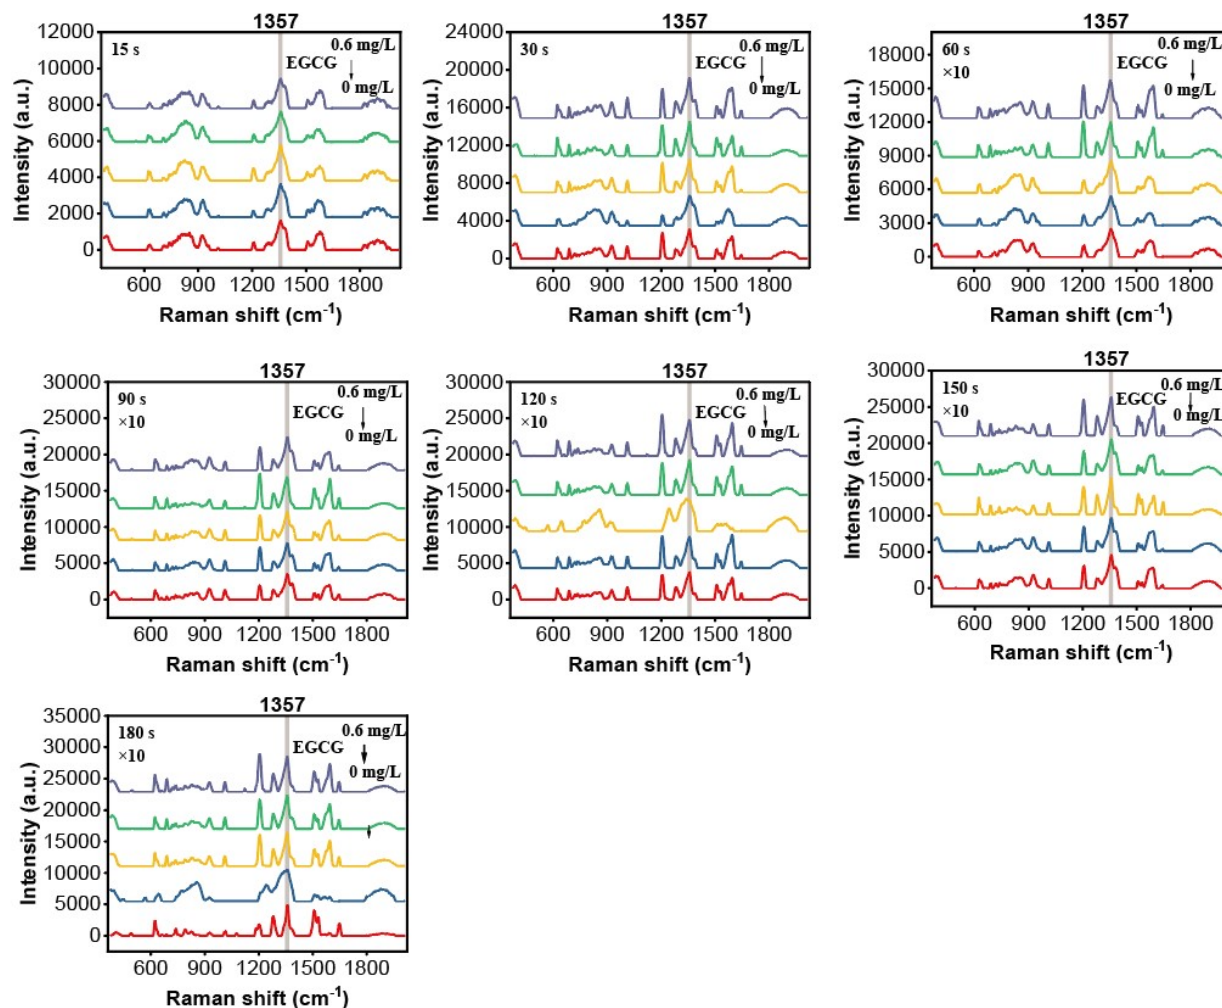

**Figure S6.** Raw SERS spectra of NPs release samples at different EGCG concentrations (0, 0.1, 0.2, 0.4, 0.6 mg/mL) subjected to various microwave heating durations (0, 15, 30, 60, 90, 120, 150, 180 s).

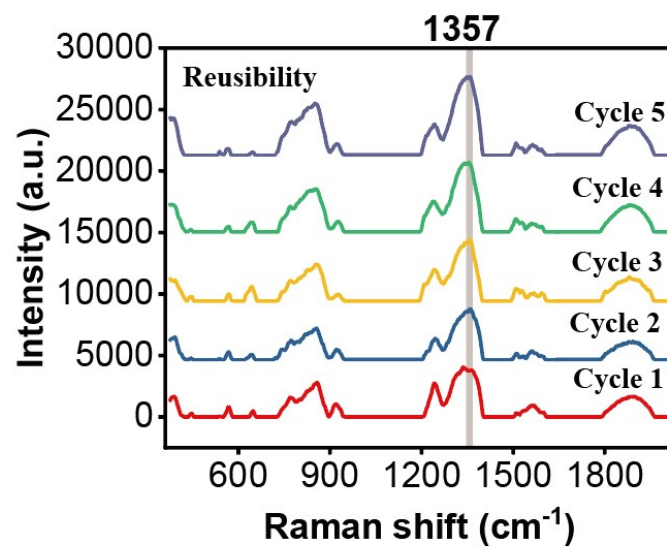

**Figure S7.** Raw SERS spectra of NPs release samples over various reuse cycles.
